# Supplementary material for: The Role of Maladaptive Pain Perceptions and Work-Related Factors in Predicting Work Ability in Employees with Musculoskeletal Pain: A Cross- Sectional Study
Source: Research Square preprint supplement (doi:10.21203/rs.3.rs-7130277/v1), 2025-09-05
Supplement: Supplementary file 1 [file 1b7e586e8c7495a662a76285.docx]

**Supplementary Table 1.** Exploratory factor analysis for the Dutch Musculoskeletal Questionnaire.

|  | Rotated factor loadings | |
| --- | --- | --- |
|  | Sedentary work | Physical demanding work |
|  |  |  |
| **At work, how often do you…** |  |  |
| (1) work standing for a prolonged time? | **-0.79a** | 0.518 |
| (2) work sitting for a prolonged time? | **0.88a** | -0.45 |
| (3) work on a computer for a prolonged time? | **0.70a** | -0.41 |
| (4) work kneeled or crouched for a prolonged time? | -0.46 | **0.67b** |
| (5) move loads (more than 5 kg)? | -0.30 | **0.98b** |
| (6) move heavy loads (more than 20 kg)? | -0.38 | **0.86b** |
| (7) have to apply force with your arms or hands? | NA | NA |
| (8) work with bumping or vibrating tools? | -0.20 | 0.53 |
| (9) drive in vehicles? | NA | NA |
| (10) work in uncomfortable positions? | -0.41 | **0.63b** |
| (11) work in the same position for a prolonged time? | 0.66 | -0.15 |
| (12) repeatedly make the same movement with your arms/hands? | NA | NA |

Item 7 was excluded from the analysis due to a technical issue in the online questionnaire. Items 9 and 12 were also removed because of poor correlations with other items (polychoric correlations < 0.3). Two factors with eigenvalues greater than 1.00 were retained, jointly explaining 77.85% of the variance. Factor loadings of 0.40 or higher were used to determine clustering. Factor 1, representing sedentary work, initially contained four items. However, removing item 11 improved internal consistency, resulting in a final Cronbach’s α of 0.85. Factor 2, representing physically demanding work, initially contained five items. Removing item 8 similarly improved internal consistency, resulting in a final Cronbach’s α of 0.89. a’ denotes items forming the sedentary work scale, and ‘b’ denotes items forming the physically demanding work scale.NA, not applicable.
