# Supplementary material for: The Role of Maladaptive Pain Perceptions and Work-Related Factors in Predicting Work Ability in Employees with Musculoskeletal Pain: A Cross- Sectional Study
Source: Research Square preprint supplement (doi:10.21203/rs.3.rs-7130277/v1), 2025-09-05
Supplement: Supplementary file 2 [file efd81ec485d4e5b64448b49b.docx]

**Supplementary Table 2:** Bivariate correlation coefficients and variance inflation factors of independent variables

|  | PD | WL | SOC | AUT | PCS | FABQA | FABQW | VIF |
| --- | --- | --- | --- | --- | --- | --- | --- | --- |
| PD | 1.00 |  |  |  |  |  |  | 1.31 |
| WL | 0.03 | 1.00 |  |  |  |  |  | 1.21 |
| SOC | -0.03 | -0.20** | 1.00 |  |  |  |  | 1.28/ |
| AUT | -0.40** | -0.17** | 0.31** | 1.00 |  |  |  | 1.45 |
| PCS | -0.02 | 0.15* | -0.18** | -0.08 | 1.00 |  |  | 1.26 |
| FBAQA | 0.07 | 0.06 | -0.11 | -0.04 | 0.33** | 1.00 |  | 1.23 |
| FABQW | 0.19** | 0.22** | -0.19** | -0.19** | 0.30** | 0.26** | 1.00 | 1.31 |

*p < 0.05; **p < 0.01. PD = Physical Demands, WL = Workload, SOC = Social Support, AUT = Autonomy, PCS = Pain Catastrophizing Scale, FABQA = Fear Avoidance Beliefs Questionnaire Work subscale, FABQA = Fear Avoidance Beliefs Questionnaire Activity subscale, VIF = Variance Inflation Factor
